# Supplementary material for: Torilin Inhibits Inflammation by Limiting TAK1-Mediated MAP Kinase and NF-κB Activation
Source: Hindawi journal article supplement (doi:10.1155/2017/7250968), 2017-01-01

## **Supplementary Figure Legend**

**Suppl. Figure 1: Effects of torilin on cell viability were measured by MTT assay**

**Suppl. Figure 2: Torilin treatment inhibits LPS stimulated multiple cytokine protein and gene expression**

RAW 264.7 were pretreated with torilin for 30 min and stimulated for 18 h (mRNA) or 24 h (protein) by LPS ( $100 \text{ ng mL}^{-1}$ ). Expression of mRNA was determined by RT-PCR or proteins by Western blot analysis. Dose-dependent inhibitions of TNF- $\alpha$  (A) and IL-1 $\beta$  (C) protein expressions as well as their mRNA expressions TNF- $\alpha$  (B) and IL-1 $\beta$  (D), respectively. Torilin inhibited IL-6 (E) and GM-CSF (F) mRNA expressions. GAPDH and  $\beta$ -actin were used as a control for RNA and protein loading, respectively. Significance was determined using Student's *t* test. Images are representative of 3 or 4 independent experiments. Values in bar graphs are means  $\pm$  SE of 4 independent experiments performed in triplicate. \*:  $P < 0.05$ , \*\*:  $P < 0.01$ , \*\*\*:  $P < 0.001$

**Suppl. Figure 3: Torilin did not affect LPS-induced PI3K and Akt activation**

RAW 264.7 cells were pretreated with torilin or vehicle for 30 min and stimulated with LPS (100 ng/ml) for the indicated time period. Cell lysates were analyzed by western blot with anti-PI3K and anti-Akt antibodies and the respective protein levels and phosphorylation status were determined  $\beta$ -Actin was used as a control for protein loading. Images are representative of 4 or experiments.

#### **Suppl. Figure 4: Torilin inhibits LPS-induced NF- $\kappa$ B activation**

RAW 264.7 cells were incubated with torilin or vehicle for 30 min and then stimulated with LPS for 15–60 min. Cell lysates were separated by SDS-PAGE and immunoblotted to detect NF- $\kappa$ B phosphorylation. Equivalent protein loading was verified by  $\beta$ -actin. Images are representative of three separate experiments. Values in bar graphs are means  $\pm$  SE of 3 independent experiments Data are representative of three separate experiments. \*P < 0.05, \*\*\*P < 0.001 vs. LPS.

#### **Suppl. Figure 5: Torilin attenuates ATF2, c-jun and c-fos phosphorylations**

RAW 264.7 cells were pretreated with the indicated concentrations of torilin for 30 min and incubated with LPS (100ng/ml) for (5–30 min) assayed for the phosphorylation of ATF2, c-jun and c-fos by western immunoblot analysis as described under ‘Materials and methods’.  $\beta$ -actin was used as a control for protein loading. Images are representative of 4 or more independent experiments.

## Supplemental Figure

Supplementary Fig. 1

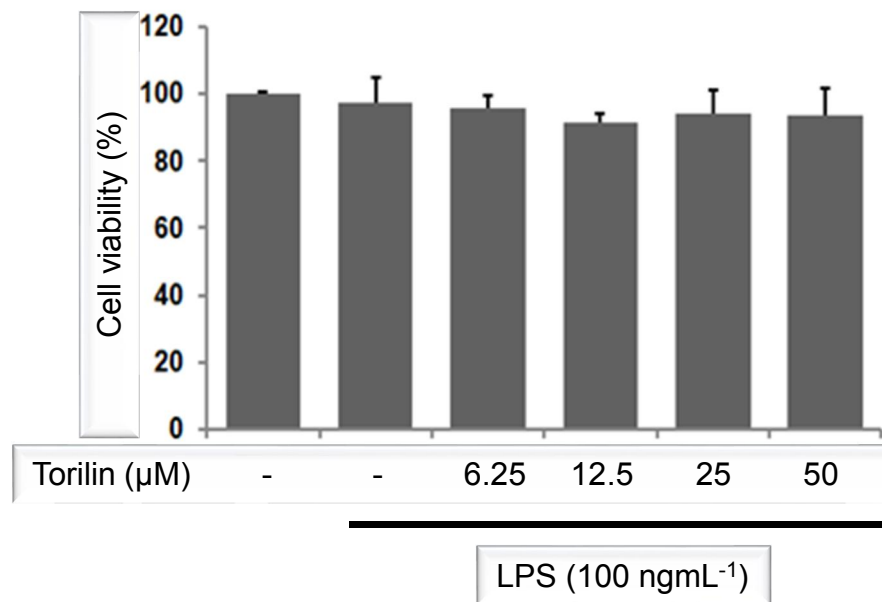

## Supplementary Fig. 2

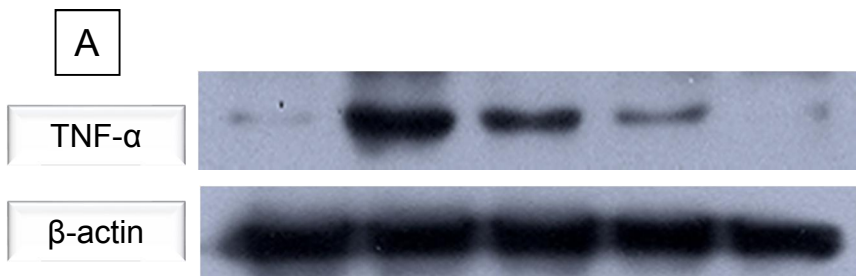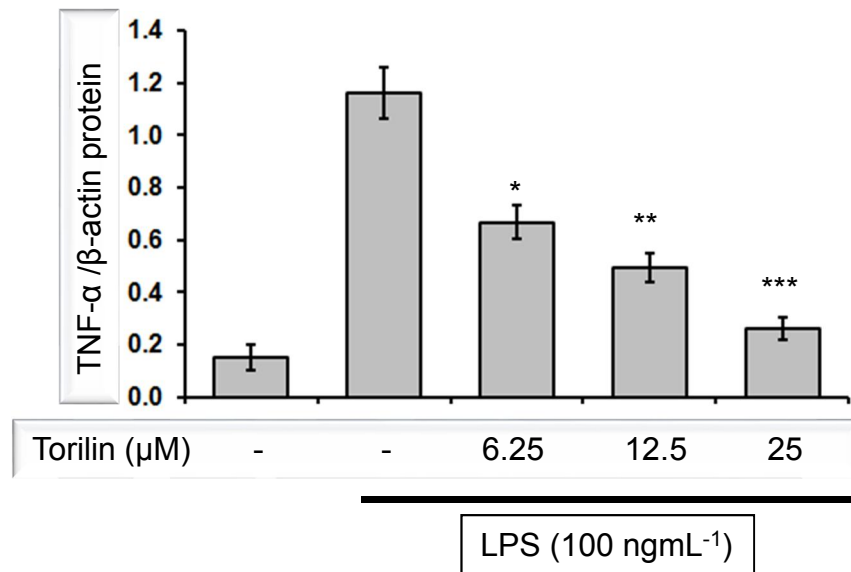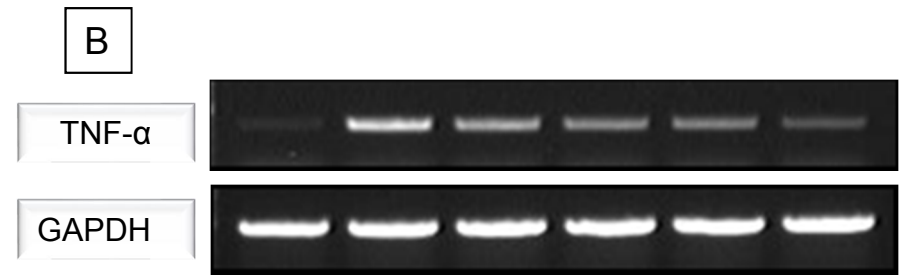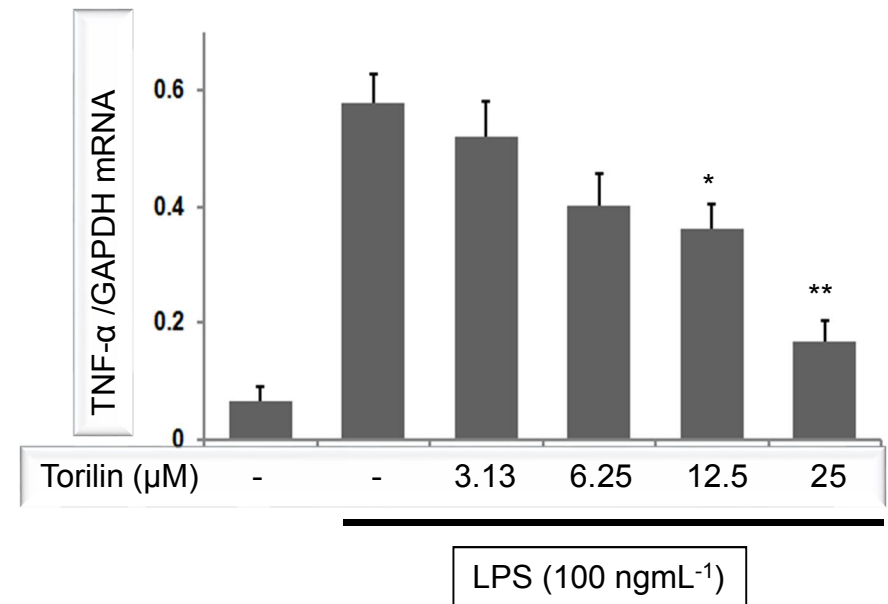

Supplementary Fig. 2

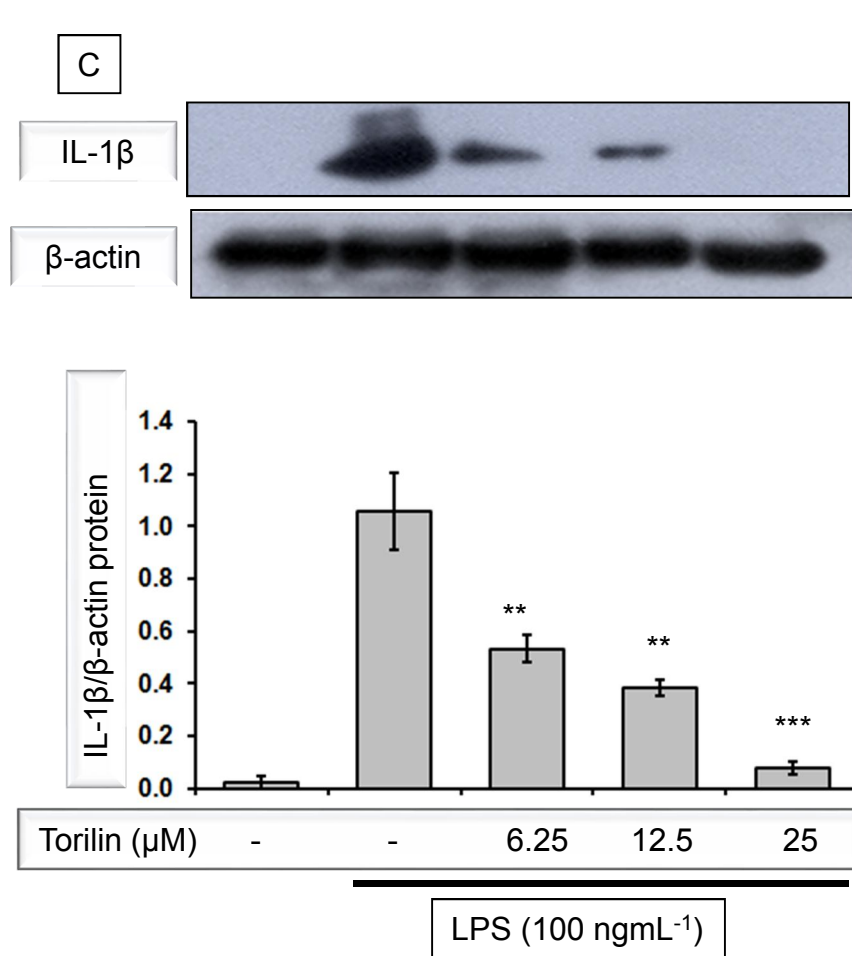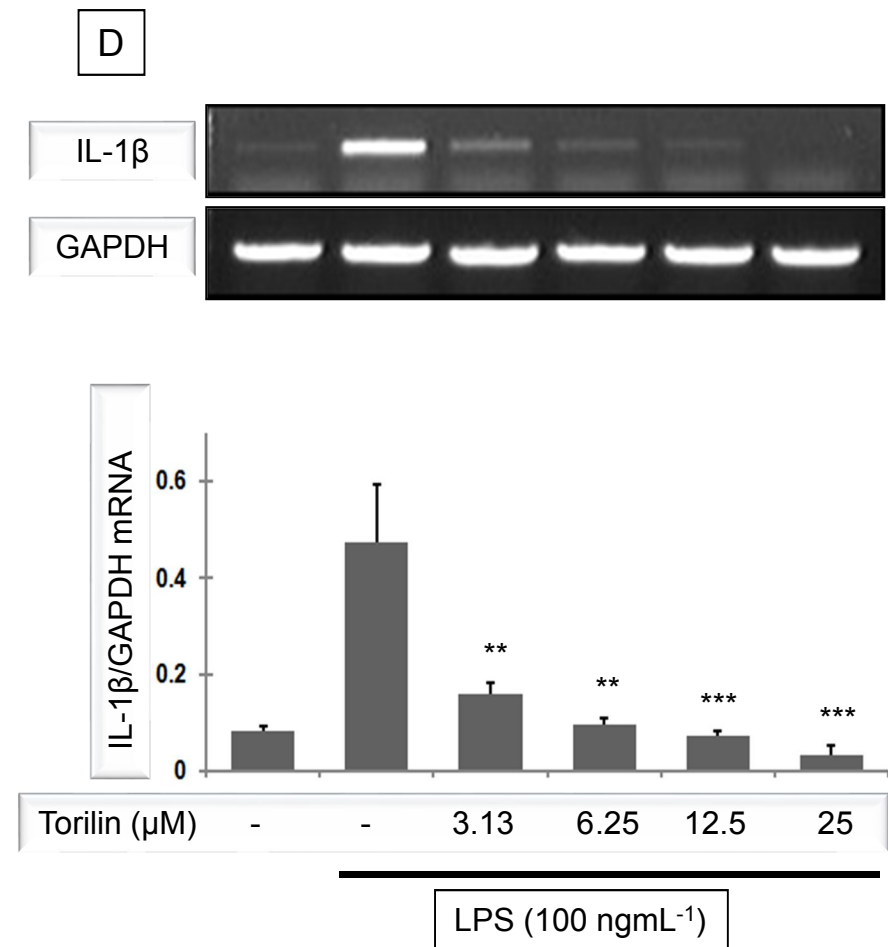

Supplementary Fig. 2

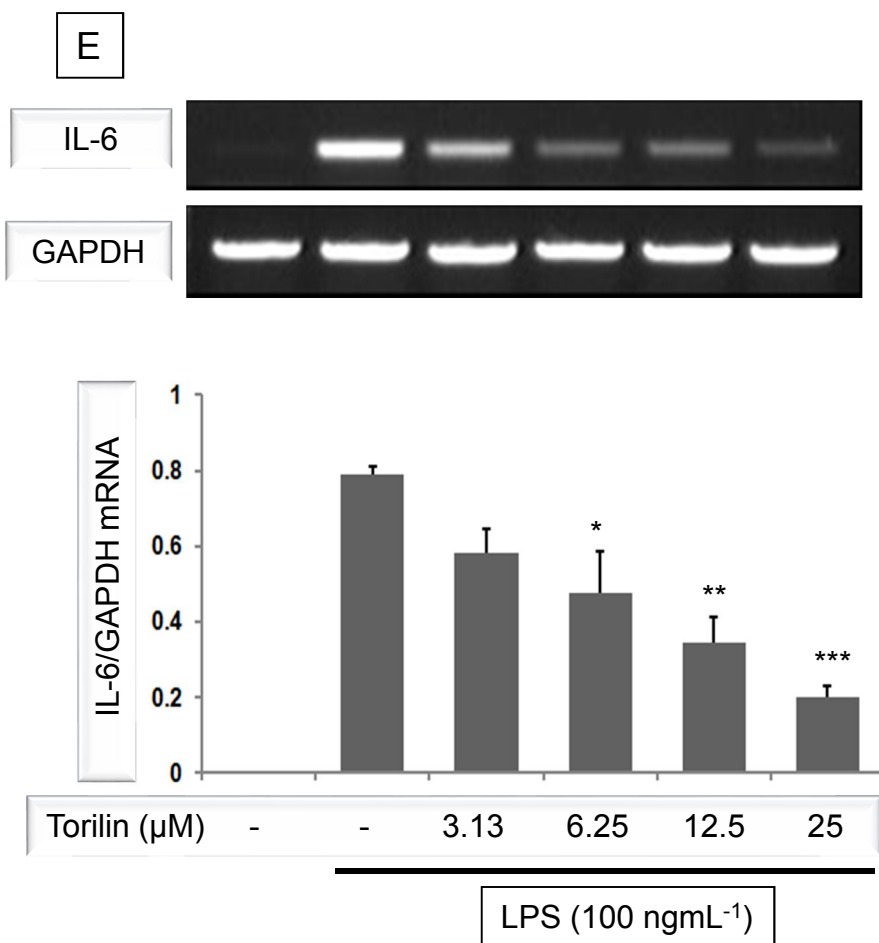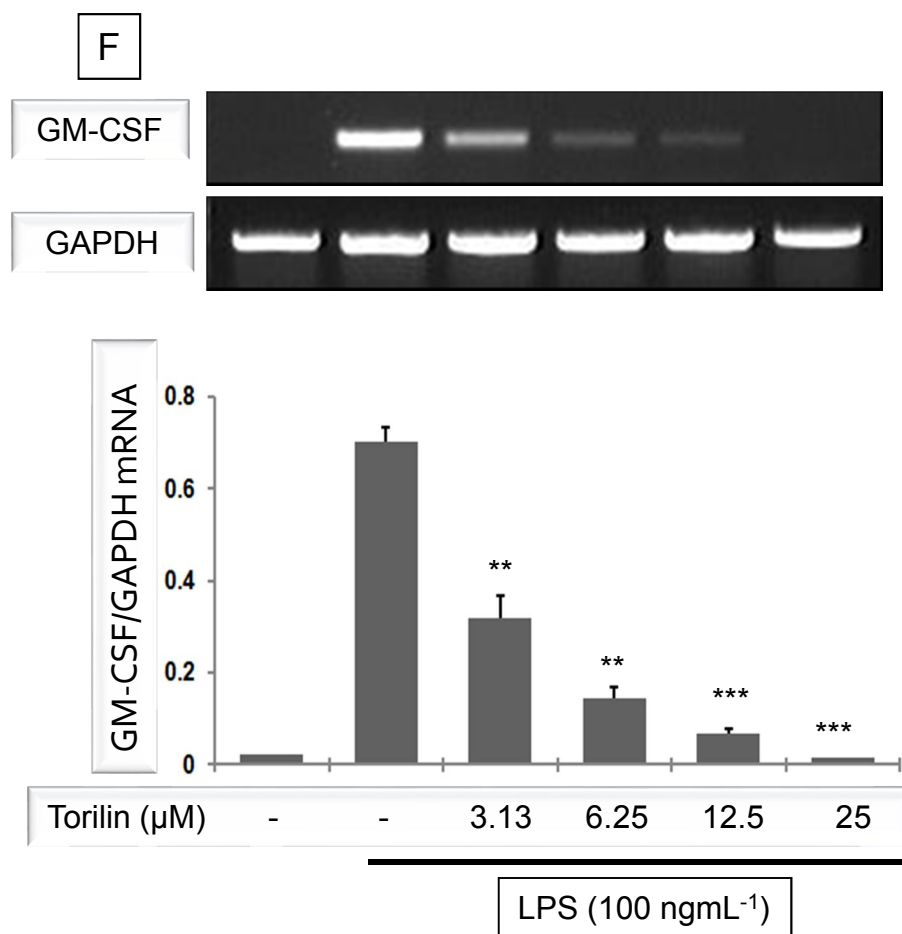

### Supplementary Fig. 3

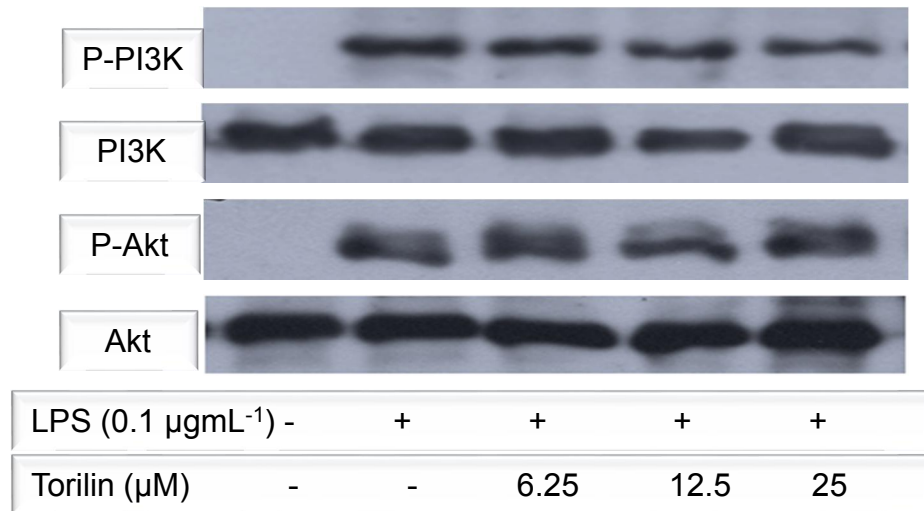



Supplementary Fig. 4

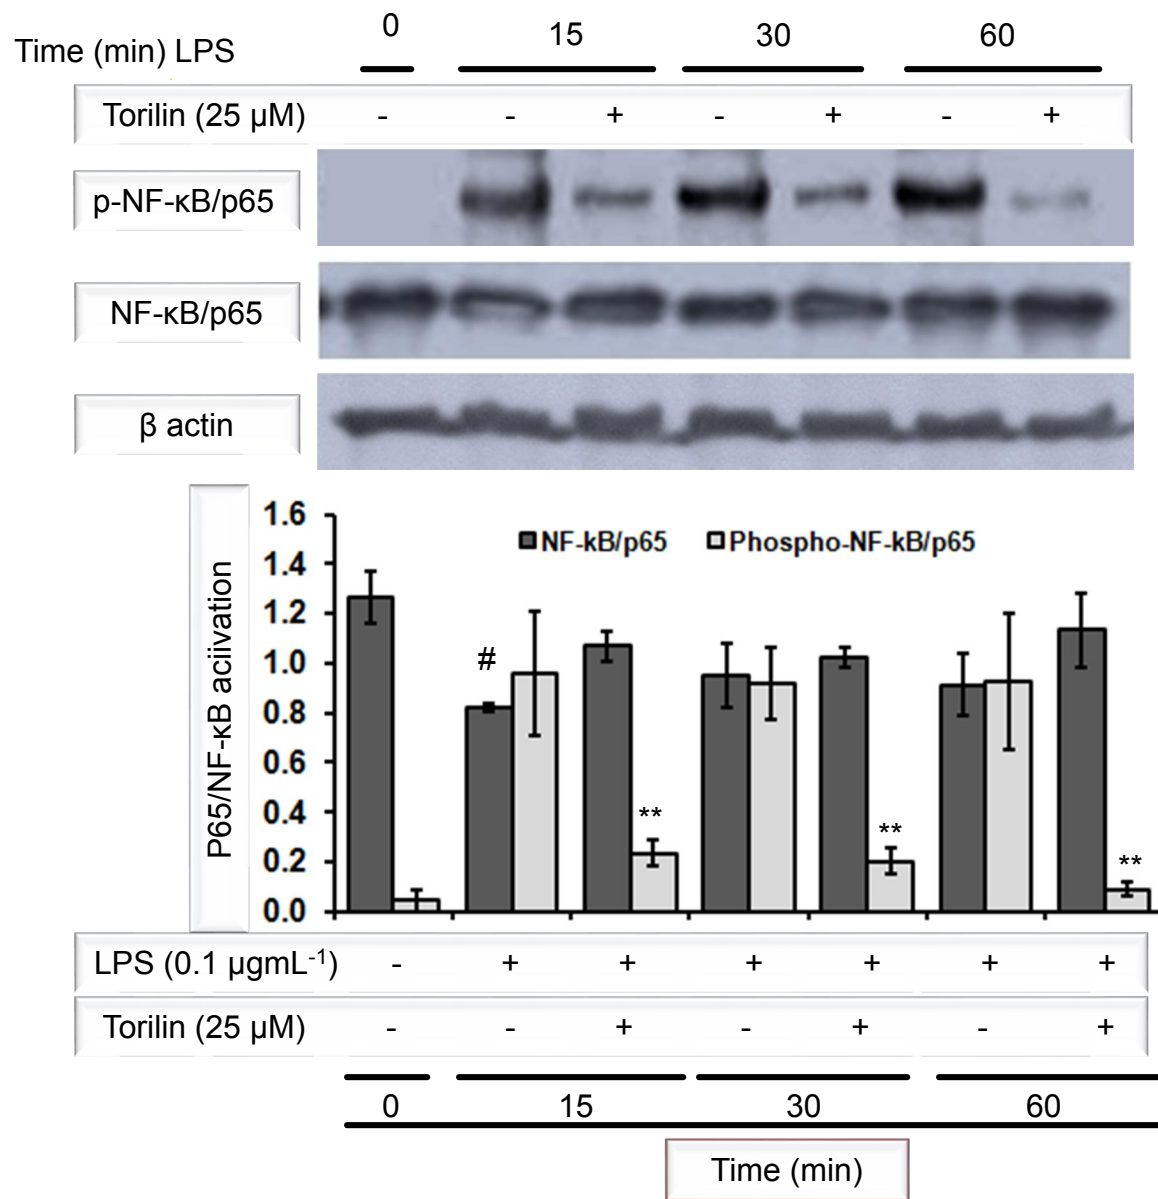

Supplementary Fig. 5

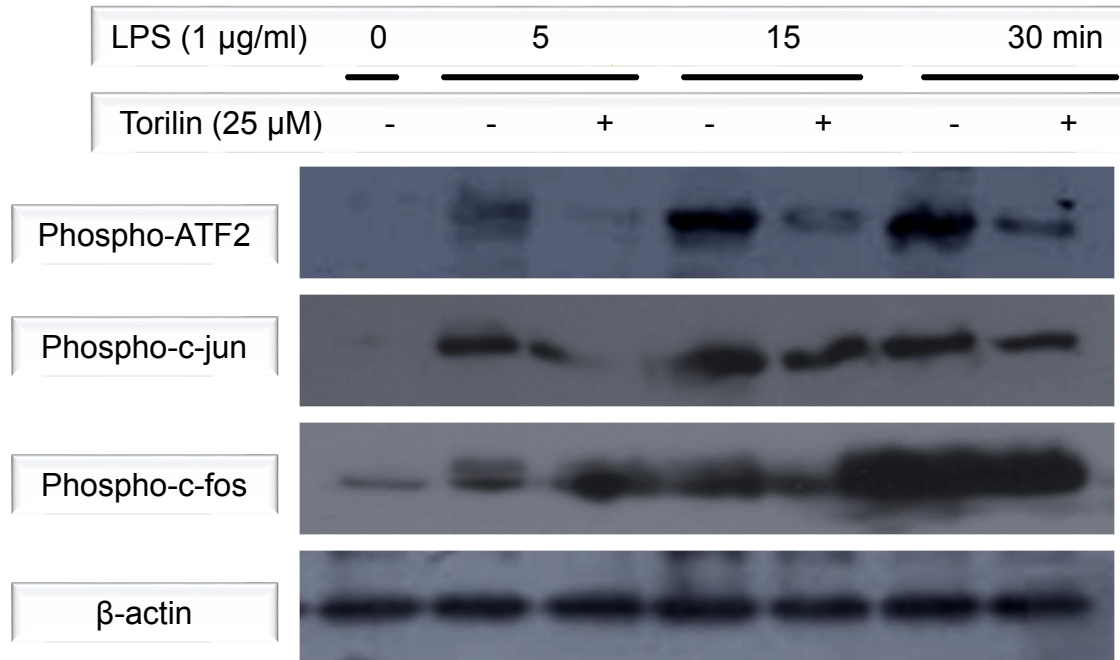

Supplement: f1 [file 7250968.f1.pdf]
